# Supplementary material for: Ketonuria as an Indicator of Improvement of Renal Function in Patients with Type 2 Diabetes Receiving SGLT2 Inhibitor Treatment
Source: PubMed Central journal article supplement — Endocrinol Metab (Seoul). 2024 May 16;39(4):653–8. doi: 10.3803/EnM.2024.1919 (PMC11375305; doi:10.3803/enm.2024.1919), 2024-05-16
Supplement: enm-2024-1919-Supplemental-Table-S1.pdf [file enm-2024-1919-Supplemental-Table-S1.pdf]

**Supplemental Table S1.** Univariable Linear Regression Analysis of Clinical Parameters at Baseline with Delta eGFR

| Variable                         | Total   |                   |                | Ketonuria (-) |                  |                | Ketonuria (+) |                   |                |
|----------------------------------|---------|-------------------|----------------|---------------|------------------|----------------|---------------|-------------------|----------------|
|                                  | $\beta$ | 95% CI            | <i>P</i> value | $\beta$       | 95% CI           | <i>P</i> value | $\beta$       | 95% CI            | <i>P</i> value |
| Women                            | 3.879   | -1.689 to 9.447   | 0.170          | -0.232        | -8.230 to 7.767  | 0.954          | 8.771         | 1.425 to 16.117   | 0.020          |
| Age, yr                          | 0.128   | -0.174 to 0.430   | 0.403          | 0.022         | -0.446 to 0.490  | 0.925          | 0.191         | -0.194 to 0.575   | 0.325          |
| Diabetes duration, yr            | 0.237   | -0.163 to 0.638   | 0.242          | -0.031        | -0.663 to 0.602  | 0.922          | 0.402         | -0.095 to 0.899   | 0.111          |
| Body weight, kg                  | -0.134  | -0.364 to 0.096   | 0.249          | 0.072         | -0.271 to 0.415  | 0.675          | -0.323        | -0.606 to -0.041  | 0.026          |
| BMI, kg/m <sup>2</sup>           | -0.276  | -1.106 to 0.553   | 0.509          | 0.368         | -0.873 to 1.608  | 0.553          | -0.758        | -1.806 to 0.290   | 0.151          |
| SBP, mm Hg                       | -0.129  | -0.322 to 0.063   | 0.185          | 0.001         | -0.342 to 0.344  | 0.994          | -0.217        | -0.434 to 0.000   | 0.050          |
| DBP, mm Hg                       | -0.221  | -0.472 to 0.031   | 0.085          | 0.026         | -0.410 to 0.463  | 0.903          | -0.404        | -0.683 to -0.125  | 0.005          |
| FPG, mg/dL                       | 0.017   | -0.038 to 0.072   | 0.536          | 0.011         | -0.071 to 0.093  | 0.782          | 0.003         | -0.071 to 0.077   | 0.945          |
| HbA1c, %                         | -0.015  | -2.521 to 2.491   | 0.991          | -0.046        | -3.536 to 3.445  | 0.979          | 0.038         | -3.498 to 3.574   | 0.983          |
| C-peptide, ng/mL                 | -0.493  | -2.004 to 1.018   | 0.518          | -0.895        | -2.795 to 1.005  | 0.347          | 0.261         | -2.299 to 2.820   | 0.838          |
| BUN, mg/dL                       | 0.072   | -0.604 to 0.749   | 0.833          | 0.486         | -0.609 to 1.582  | 0.377          | -0.273        | -1.106 to 0.560   | 0.514          |
| Creatinine, mg/dL                | 1.421   | -13.491 to 16.332 | 0.850          | 11.373        | -9.763 to 32.510 | 0.285          | -7.209        | -27.534 to 13.116 | 0.480          |
| eGFR, mL/min/1.73 m <sup>2</sup> | -0.096  | -0.221 to 0.028   | 0.128          | -0.172        | -0.364 to 0.020  | 0.079          | -0.067        | -0.227 to 0.092   | 0.401          |
| Uric acid, mg/dL                 | -0.856  | -3.024 to 1.312   | 0.435          | 0.736         | -2.411 to 3.883  | 0.641          | -1.806        | -4.743 to 1.131   | 0.222          |
| AST, IU/L                        | 0.096   | -0.056 to 0.248   | 0.214          | 0.130         | -0.156 to 0.416  | 0.364          | 0.077         | -0.098 to 0.251   | 0.381          |
| ALT, IU/L                        | 0.013   | -0.092 to 0.118   | 0.807          | 0.065         | -0.093 to 0.223  | 0.411          | -0.015        | -0.152 to 0.122   | 0.825          |
| Total cholesterol, mg/dL         | 0.000   | -0.062 to 0.062   | 0.996          | 0.003         | -0.106 to 0.112  | 0.952          | -0.002        | -0.075 to 0.071   | 0.952          |
| TG, mg/dL                        | -0.013  | -0.034 to 0.009   | 0.252          | 0.030         | -0.007 to 0.068  | 0.111          | -0.032        | -0.056 to -0.009  | 0.009          |
| HDL-cholesterol, mg/dL           | -0.059  | -0.311 to 0.193   | 0.644          | -0.303        | -0.700 to 0.094  | 0.132          | 0.074         | -0.242 to 0.390   | 0.640          |
| LDL-cholesterol, mg/dL           | 0.022   | -0.061 to 0.105   | 0.602          | -0.018        | -0.153 to 0.118  | 0.795          | 0.040         | -0.063 to 0.143   | 0.444          |
| ACR $\geq$ 30 mg/g               | -4.361  | -11.049 to 2.328  | 0.199          | -1.340        | -10.298 to 7.618 | 0.765          | -5.808        | -16.020 to 4.403  | 0.258          |
| Hypertension                     | -2.881  | -8.389 to 2.628   | 0.302          | 4.327         | -3.364 to 12.018 | 0.264          | -8.145        | -16.137 to -0.154 | 0.046          |
| Dyslipidemia                     | 3.189   | -2.204 to 8.581   | 0.244          | 4.931         | -2.875 to 12.738 | 0.210          | 3.171         | -4.160 to 10.501  | 0.389          |
| Ketonuria                        | 6.827   | 12.071 to 1.583   | 0.011          | -             | -                | -              | -             | -                 | -              |

eGFR, estimated glomerular filtration rate;  $\beta$ , standardized beta coefficient; CI, confidence interval; BMI, body mass index; SBP, systolic blood pressure; DBP, diastolic blood pressure; FPG, fasting plasma glucose; HbA1c, hemoglobin A1c; BUN, blood urea nitrogen; eGFR, estimated glomerular filtration rate; AST, aspartate aminotransferase; ALT, alanine aminotransferase; TG, triglyceride; HDL, high-density lipoprotein; LDL, low-density lipoprotein; ACR, albumin-creatinine ratio.
