# Supplementary figures and images for: Ketonuria as an Indicator of Improvement of Renal Function in Patients with Type 2 Diabetes Receiving SGLT2 Inhibitor Treatment
Source: PubMed Central journal article supplement — Endocrinol Metab (Seoul). 2024 May 16;39(4):653–8. doi: 10.3803/EnM.2024.1919 (PMC11375305; doi:10.3803/enm.2024.1919), 2024-05-16

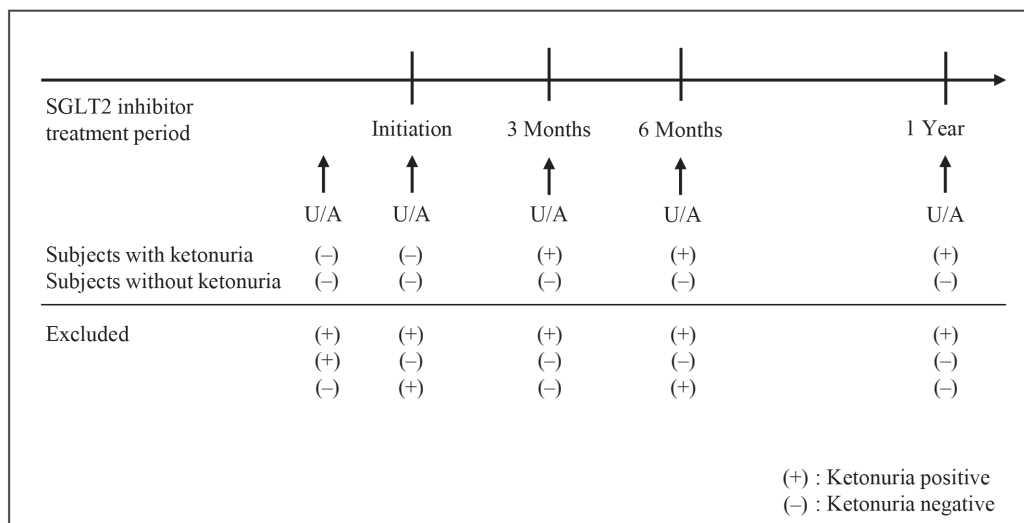

**Supplemental Fig. S1.** Study flow. SGLT2, sodium-glucose cotransporter-2; U/A, urine analysis.

Supplement: enm-2024-1919-Supplemental-Fig-S1.pdf [file enm-2024-1919-Supplemental-Fig-S1.pdf]
